# Supplementary material for: The repurposing of Tebipenem pivoxil as alternative therapy for severe gastrointestinal infections caused by extensively drug-resistant Shigella spp
Source: eLife. 2022 Mar 15;11:e69798. doi: 10.7554/eLife.69798 (PMC8959600; doi:10.7554/eLife.69798)
Supplement: Supplementary file 1. [file elife-69798-supp1.xlsx]

## Sheet: Shigella spp.
Strain ID	Organism	Nalidixic acid	Ciprofloxacin	Ceftriaxone	Ceftazidime	Augmentin	Ampicilin	Bactrim	Azithromycin	Chloramphenicol	Imipenem	Amikacin	Gentamicin	ESBL
01-0020	S. sonnei	R	S	S	S	S	R	R	S	S	S	S	S	Neg
01-0033	S. sonnei	R	S	R	R	R	R	R	R	S	S	S	R	Pos
01-0062	S. sonnei	I	S	R	R	R	R	R	S	S	S	S	S	Pos
01-0075	S. sonnei	R	R	S	S	S	S	R	S	S	S	S	S	Neg
01-0123	S. sonnei	R	R	R	R	R	R	R	S	S	S	S	S	Pos
01-0126	S. sonnei	R	R	S	S	S	S	R	S	S	S	S	S	Neg
01-0133	S. sonnei	R	S	S	S	S	S	R	S	S	S	S	S	Neg
01-0167	S. flexneri	R	S	I	S	R	R	R	R	R	I	I	I	Neg
01-0213	S. sonnei	R	S	R	R	R	R	R	S	S	S	S	S	Pos
01-0247	S. sonnei	R	R	R	R	R	R	R	S	S	S	S	S	Pos
01-0296	S. sonnei	R	I	S	S	S	S	R	R	S	I	S	S	Neg
01-0342	S. sonnei	R	R	R	R	R	R	R	S	S	S	S	S	Pos
01-0417	S. flexneri	R	S	R	R	R	R	R	R	R	S	S	S	Pos
01-0513	S. sonnei	R	R	R	R	R	R	R	S	S	S	S	S	Pos
01-0520	S. sonnei	R	R	R	R	R	R	S	S	S	S	S	S	Pos
01-0643	S. sonnei	R	R	R	R	R	R	R	S	S	S	S	S	Pos
01-0805	S. flexneri	R	S	S	S	R	R	R	S	R	S	S	S	Neg
01-0839	S. sonnei	R	R	R	R	R	R	R	S	S	S	S	S	Pos
01-0908	S. sonnei	R	R	R	R	R	R	R	R	S	S	S	R	Pos
01-0932	S. sonnei	R	R	R	R	R	R	R	R	S	S	S	R	Pos
02-0007	S. sonnei	R	R	S	S	S	R	R	S	S	S	S	S	Neg
02-0051	S. sonnei	R	R	S	S	S	S	R	S	S	S	S	S	Neg
02-1018	S. flexneri	S	S	S	S	I	R	R	S	R	S	S	S	Neg
02-1048	S. sonnei	R	R	S	S	S	S	R	S	S	S	S	S	Neg
02-1050	S. sonnei	R	I	R	I	R	R	R	S	S	S	S	S	Neg
02-1078	S. sonnei	R	R	R	R	R	R	R	S	S	S	S	S	Pos
02-1090	S. sonnei	R	R	R	R	R	R	R	S	S	S	S	S	Pos
02-1120	S. sonnei	R	R	R	R	R	R	R	S	S	S	S	S	Pos
02-1137	S. sonnei	R	S	R	R	R	R	R	S	S	S	S	S	Pos
02-1157	S. sonnei	R	R	S	S	S	S	R	R	S	S	S	S	Neg
02-1168	S. sonnei	R	R	R	R	R	R	R	S	S	S	S	S	Pos
02-1181	S. sonnei	R	R	R	R	R	R	R	R	S	S	S	R	Pos
02-1259	S. sonnei	R	S	S	S	S	S	R	S	S	S	S	S	Neg
02-1272	S. sonnei	R	R	S	S	S	S	R	S	S	S	S	S	Neg
02-1377	S. sonnei	R	R	R	R	R	R	R	S	S	S	I	I	Pos
02-1427	S. sonnei	R	R	R	R	R	R	R	S	S	S	S	S	Pos
02-1483	S. flexneri	R	S	S	S	I	R	R	S	R	S	S	S	Neg
02-1611	S. flexneri	R	R	S	S	R	R	R	R	R	S	S	S	Neg
02-1936	S. sonnei	R	R	R	R	R	R	R	S	S	S	S	S	Pos
02-1940	S. sonnei	R	R	S	S	R	R	R	R	S	S	S	S	Neg
02-2007	S. sonnei	R	S	R	R	R	R	R	S	S	S	S	S	Pos
02-2114	S. sonnei	R	R	S	S	S	S	R	S	S	S	S	S	Neg
02-2138	S. sonnei	R	R	R	R	R	R	R	S	S	S	S	S	Pos
02-2142	S. sonnei	R	R	R	R	R	R	R	R	S	S	S	R	Pos
02-2187	S. flexneri	R	S	S	S	I	R	R	S	I	S	S	S	Neg
03-0019	S. sonnei	R	R	S	S	S	S	R	S	S	S	S	S	Neg
03-0044	S. sonnei	R	R	R	R	R	R	R	R	S	S	S	S	Pos
03-0050	S. sonnei	R	R	S	S	S	S	R	S	S	S	S	S	Neg
03-0066	S. sonnei	S	S	S	S	S	S	R	S	S	S	S	S	Neg
03-0073	S. sonnei	R	S	I	I	R	R	R	S	S	S	S	S	Neg
03-0138	S. sonnei	R	R	R	R	R	R	R	S	S	S	S	S	Pos
03-0142	S. sonnei	R	S	S	S	S	S	R	S	S	S	S	S	Neg
03-0176	S. sonnei	R	S	S	S	S	S	R	S	S	S	S	S	Neg
03-0194	S. sonnei	R	R	R	R	R	R	R	R	S	S	S	R	Pos
03-0217	S. sonnei	R	R	R	R	R	R	R	S	S	S	S	S	Pos
03-0261	S. sonnei	R	R	R	R	R	R	S	S	S	S	S	S	Pos
03-0268	S. sonnei	R	R	R	R	R	R	R	R	S	S	I	S	Pos
03-0301	S. sonnei	R	R	S	S	S	S	R	S	S	S	S	S	Neg
03-0331	S. sonnei	R	R	S	S	S	S	R	S	S	S	S	S	Neg
03-0333	S. sonnei	R	R	R	R	R	R	R	S	S	S	S	S	Pos
03-0344	S. sonnei	R	R	R	R	R	R	R	S	S	S	S	S	Pos
03-0409	S. sonnei	R	R	R	R	R	R	R	S	S	S	S	S	Pos
03-0416	S. sonnei	R	S	S	S	S	S	R	S	S	S	S	S	Neg
03-0429	S. sonnei	R	R	S	S	S	S	R	S	S	S	S	S	Neg
03-0441	S. sonnei	R	R	S	S	S	S	R	S	S	S	S	S	Neg
03-0463	S. sonnei	R	R	R	R	R	R	I	S	S	S	S	S	Pos
03-0487	S. sonnei	R	S	S	S	S	S	R	S	S	S	S	S	Neg
03-0502	S. sonnei	R	R	S	S	S	S	R	S	S	S	S	S	Neg
03-0514	S. sonnei	R	R	R	R	R	R	R	R	S	S	S	S	Pos
03-0533	S. sonnei	R	S	R	R	R	R	R	S	S	S	S	S	Pos
03-0573	S. sonnei	R	R	R	R	R	R	S	S	S	S	S	S	Pos
03-0594	S. sonnei	R	R	R	R	R	R	R	R	S	S	S	R	Pos
03-0732	S. sonnei	R	S	S	S	S	S	R	S	S	S	S	S	Neg
03-0780	S. sonnei	R	R	R	R	R	R	R	R	S	S	S	R	Pos
03-0846	S. sonnei	R	R	S	S	S	S	R	S	S	S	S	S	Neg
03-0871	S. sonnei	R	R	R	R	S	R	R	S	S	S	S	S	ND
03-0910	S. sonnei	R	R	R	R	R	R	R	R	S	S	S	R	Pos
03-0920	S. sonnei	R	S	S	S	S	S	R	S	S	S	S	S	Neg
03-0953	S. sonnei	R	R	R	R	R	R	R	S	S	S	S	S	Pos
03-0967	S. sonnei	R	S	S	S	S	S	R	S	S	S	S	S	Neg
03-0977	S. sonnei	R	R	R	R	R	R	R	S	S	S	S	S	Pos
Strain ID	Organism	Nalidixic acid	Ciprofloxacin	Ceftriaxone	Ceftazidime	Augmentin	Ampicillin	Trimethoprim	Azithromycin	Chloramphenicol	Imipenem	Amikacin	Gentamicin	ESBL	Ofloxacin	Gatifloxacin	Tetracyline
EG478	S. flexneri 2a	R	S	S			R	R		R			S	Neg	S	S	R

## Sheet: Salmonella typhimurium
Strain ID	Organism	Nalidixic acid	Ciprofloxacin	Ceftriaxone	Ceftazidime	Augmentin	Ampicilin	Bactrim	Azithromycin	Chloramphenicol	Imipenem	Amikacin	Gentamicin	ESBL
01-0012	Salmonella typhimurium	I	I	R	R	R	R	S	S	R	S	S	S	Pos
01-0014	Salmonella typhimurium	S	S	S	S	S	R	S	S	S	S	S	S	Neg
01-0024	Salmonella typhimurium	S	S	S	S	S	R	S	S	R	S	S	S	Neg
01-0048	Salmonella typhimurium	I	I	R	R	R	R	S	S	R	S	S	S	Pos
01-0050	Salmonella typhimurium	R	I	S	S	S	R	S	S	S	S	S	S	Neg
01-0052	Salmonella typhimurium	S	I	S	S	S	R	S	R	R	S	S	R	Neg
01-0057	Salmonella typhimurium	I	I	S	S	I	R	S	S	R	S	S	S	Neg
01-0063	Salmonella typhimurium	S	I	S	S	S	R	S	R	R	S	S	R	Neg
01-0067	Salmonella typhimurium	S	I	R	R	R	R	S	S	R	S	S	S	Pos
01-0109	Salmonella typhimurium	S	I	S	S	S	R	R	S	R	S	S	S	Neg
01-0111	Salmonella typhimurium	S	S	S	S	S	S	R	S	R	S	S	S	Neg
01-0119	Salmonella typhimurium	I	I	R	R	R	R	S	S	R	S	S	R	Pos
01-0158	Salmonella typhimurium	S	I	S	S	S	R	S	R	R	S	S	R	Neg
01-0168	Salmonella typhimurium	S	I	S	I	I	R	S	R	S	I	I	I	Neg
01-0186	Salmonella typhimurium	S	I	S	S	S	R	S	R	R	S	S	R	Neg
01-0204	Salmonella typhimurium	S	I	S	S	S	R	S	S	R	S	S	S	Neg
01-0222	Salmonella typhimurium	I	I	S	S	S	R	R	S	R	S	S	S	Neg
01-0234	Salmonella typhimurium	S	S	S	S	S	R	S	S	S	S	S	S	Neg
01-0254	Salmonella typhimurium	S	I	R	R	R	R	S	S	R	S	S	S	Pos
01-0271	Salmonella typhimurium	S	S	S	S	S	R	S	S	S	S	S	S	Neg
01-0273	Salmonella typhimurium	I	I	R	R	R	R	S	S	R	S	S	R	Pos
01-0280	Salmonella typhimurium	I	I	R	R	R	R	S	S	R	S	S	S	Pos
01-0284	Salmonella typhimurium	S	S	S	S	S	R	R	S	S	S	S	R	Neg
01-0286	Salmonella typhimurium	R	I	S	S	S	R	R	R	R	S	S	R	Neg
01-0294	Salmonella typhimurium	R	I	S	S	S	R	R	R	R	S	S	R	Neg
01-0309	Salmonella typhimurium	I	S	S	S	S	R	R	S	R	S	S	R	Neg
01-0396	Salmonella typhimurium	S	S	S	S	S	R	S	S	S	S	S	S	Neg
01-0410	Salmonella typhimurium	I	I	S	S	S	R	R	S	R	S	S	R	Neg
01-0436	Salmonella typhimurium	I	I	S	S	S	R	R	S	R	S	S	S	Neg
02-0005	Salmonella typhimurium	I	I	R	R	R	R	S	S	R	S	S	S	Pos
02-0011	Salmonella typhimurium	S	S	S	S	S	R	S	S	S	S	S	S	Neg
02-0030	Salmonella typhimurium	R	R	R	R	R	R	S	R	R	S	S	R	Pos
02-0040	Salmonella typhimurium	I	I	S	S	S	R	R	R	S	S	S	R	Neg
02-0069	Salmonella typhimurium	R	R	R	R	R	R	S	R	R	S	I	S	Pos
02-0075	Salmonella typhimurium	R	I	S	S	S	R	R	S	R	S	S	S	Neg
02-1006	Salmonella typhimurium	S	I	R	R	R	R	S	S	R	S	S	S	Pos
02-1023	Salmonella typhimurium	S	I	R	R	R	R	S	S	R	S	S	R	Pos
02-1035	Salmonella typhimurium	S	S	S	S	S	R	S	S	S	S	S	S	Neg
02-1041	Salmonella typhimurium	S	S	S	S	S	R	R	S	R	S	S	S	Neg
02-1042	Salmonella typhimurium	S	S	S	S	S	R	S	S	S	S	S	S	Neg
02-1051	Salmonella typhimurium	S	S	S	S	S	S	S	S	S	S	S	S	Neg
02-1056	Salmonella typhimurium	I	R	I	S	S	S	R	R	R	S	S	S	Neg
02-1060	Salmonella typhimurium	S	I	S	S	S	R	S	R	R	S	S	R	Neg
02-1063	Salmonella typhimurium	S	I	S	S	S	R	S	R	R	S	S	R	Neg
02-1064	Salmonella typhimurium	I	I	S	S	S	R	R	S	R	S	S	S	Neg
02-1071	Salmonella typhimurium	I	I	R	R	R	R	S	S	R	S	S	S	Pos
02-1089	Salmonella typhimurium	I	I	R	R	R	R	S	S	R	S	S	S	Pos
02-1107	Salmonella typhimurium	I	I	S	S	S	R	R	S	R	S	S	S	Neg
02-1135	Salmonella typhimurium	S	S	S	S	S	S	S	S	S	S	S	S	Neg
02-1184	Salmonella typhimurium	S	I	S	S	S	R	R	S	R	S	S	S	Neg
02-1190	Salmonella typhimurium	R	I	S	S	I	R	R	S	R	S	S	R	Neg
02-1193	Salmonella typhimurium	S	I	S	S	I	R	R	S	R	S	S	S	Neg
02-1206	Salmonella typhimurium	S	I	S	S	S	R	S	R	R	S	S	R	Neg
02-1249	Salmonella typhimurium	S	S	S	S	S	R	S	S	S	S	S	S	Neg
02-1273	Salmonella typhimurium	R	I	S	S	S	R	S	S	R	S	S	R	Neg
02-1302	Salmonella typhimurium	S	S	S	S	S	R	S	S	S	S	S	S	Neg
02-1317	Salmonella typhimurium	S	S	S	S	S	R	R	S	R	S	S	R	Neg
02-1347	Salmonella typhimurium	R	I	S	S	I	R	R	R	R	S	S	R	Neg
02-1380	Salmonella typhimurium	S	I	S	S	I	R	R	S	R	S	S	S	Neg
02-1404	Salmonella typhimurium	I	I	S	S	S	R	R	S	R	S	S	S	Neg
02-1428	Salmonella typhimurium	I	I	S	S	S	R	S	R	R	S	S	R	Neg
02-1439	Salmonella typhimurium	I	I	S	S	S	R	S	S	R	S	S	S	Neg
02-1447	Salmonella typhimurium	R	R	S	S	S	R	R	R	R	S	S	R	Neg
02-1449	Salmonella typhimurium	S	S	S	S	S	R	S	S	S	S	S	S	Neg
02-1476	Salmonella typhimurium	S	I	S	S	S	R	R	S	R	S	S	S	Neg
02-1481	Salmonella typhimurium	S	I	S	S	S	S	S	R	R	S	S	R	Neg
02-1489	Salmonella typhimurium	I	I	R	R	R	R	S	S	R	S	S	S	Pos
02-1504	Salmonella typhimurium	S	I	S	S	S	R	R	S	R	S	S	S	Neg
03-0008	Salmonella typhimurium	S	I	S	S	S	R	S	S	R	S	S	S	Neg
03-0029	Salmonella typhimurium	S	I	R	R	R	R	S	S	R	S	S	S	Pos
03-0051	Salmonella typhimurium	S	S	S	S	S	R	S	S	S	S	S	S	Neg
03-0057	Salmonella typhimurium	S	I	S	S	I	R	R	R	R	S	S	S	Neg
03-0087	Salmonella typhimurium	R	I	S	S	S	R	R	R	R	S	S	R	Neg
03-0115	Salmonella typhimurium	I	I	S	S	S	R	R	R	R	S	S	R	Neg
03-0116	Salmonella typhimurium	S	S	S	S	S	S	S	S	S	S	S	S	Neg
03-0121	Salmonella typhimurium	R	I	R	R	R	R	S	R	R	S	S	S	Pos
03-0122	Salmonella typhimurium	S	I	S	S	S	R	R	S	R	S	S	S	Neg
03-0196	Salmonella typhimurium	I	I	S	S	I	R	S	S	S	S	S	S	Neg
03-0242	Salmonella typhimurium	R	R	R	R	R	R	S	R	R	S	S	S	Pos
03-0281	Salmonella typhimurium	I	I	S	S	S	R	R	S	R	S	S	S	Neg
03-0292	Salmonella typhimurium	R	R	R	R	R	R	S	R	R	S	S	R	Pos
03-0294	Salmonella typhimurium	S	I	S	S	S	R	R	R	R	S	S	S	Neg
03-0300	Salmonella typhimurium	I	I	S	S	S	R	R	S	R	S	S	S	Neg
03-0309	Salmonella typhimurium	I	I	S	S	S	R	R	S	R	S	S	S	Neg
03-0324	Salmonella typhimurium	S	I	S	S	S	R	R	S	R	S	S	S	Neg
03-0339	Salmonella typhimurium	R	I	S	S	S	R	R	R	R	S	S	R	Neg
03-0368	Salmonella typhimurium	S	S	S	S	S	R	S	S	S	S	S	S	Neg
03-0443	Salmonella typhimurium	S	I	R	R	R	R	S	S	I	S	S	S	Pos
03-0457	Salmonella typhimurium	S	I	S	S	S	R	R	S	R	S	S	S	Neg
03-0471	Salmonella typhimurium	I	I	S	S	S	R	R	S	R	S	S	S	Neg
03-0505	Salmonella typhimurium	S	S	S	S	S	R	S	S	S	I	S	S	Neg
03-0530	Salmonella typhimurium	S	I	S	S	S	R	R	S	R	S	S	S	Neg
03-0582	Salmonella typhimurium	S	I	S	S	S	R	I	S	R	S	S	S	Neg
03-0583	Salmonella typhimurium	I	S	S	S	S	R	S	S	S	S	S	S	Neg
03-0655	Salmonella typhimurium	S	S	S	S	S	R	S	S	R	S	S	S	Neg
03-0667	Salmonella typhimurium	S	I	S	S	S	R	S	S	R	S	S	S	Neg
03-0689	Salmonella typhimurium	I	I	S	S	S	R	R	S	R	S	S	S	Neg
03-0726	Salmonella typhimurium	I	I	S	S	S	R	R	S	R	S	S	S	Neg
03-0770	Salmonella typhimurium	I	I	R	R	R	R	S	S	R	S	S	S	Pos
03-0808	Salmonella typhimurium	S	I	S	S	S	R	R	S	R	S	S	S	Neg

## Sheet: Salmonella enteritidis
Strain ID	Organism	Nalidixic acid	Ciprofloxacin	Ceftriaxone	Ceftazidime	Augmentin	Ampicilin	Bactrim	Azithromycin	Chloramphenicol	Imipenem	Amikacin	Gentamicin	Erythomycin	ESBL
01-0090	Salmonella enteritidis	R	S	S	S	S	R	S	S	S	S	S	S		Neg
01-0216	Salmonella enteritidis	S	S	S	S	S	S	S	S	S	S	S	S		Neg
01-0228	Salmonella enteritidis	R	S	S	S	S	R	S	S	S	S	S	S		Neg
01-0321	Salmonella enteritidis	R	S	S	S	S	R	S	S	S	S	S	S		Neg
01-0592	Salmonella enteritidis	S	S	R	R	R	R	S	S	S	S	S	S		Pos
02-0006	Salmonella enteritidis	S	S	S	S	S	R	S	S	S	S	S	S		Neg
02-1005	Salmonella enteritidis	S	S	S	S	S	R	S	S	S	S	S	S		Neg
02-1080	Salmonella enteritidis	R	S	S	S	S	R	S	S	S	S	S	S		Neg
02-1155	Salmonella enteritidis	R	S	S	S	S	R	S	S	S	S	S	S		Neg
02-1170	Salmonella enteritidis	R	S	S	S	S	R	S	S	S	S	S	S		Neg
02-1247	Salmonella enteritidis	S	S	S	S	S	S	S	S	S	S	S	S		Neg
02-1453	Salmonella enteritidis	R	S	S	S	S	R	S	S	S	S	S	S		Neg
02-1584	Salmonella enteritidis	S	S	S	S	S	S	S	S	S	S	S	S		Neg
02-1614	Salmonella enteritidis	S	S	S	S	S	S	S	S	S	S	S	S		Neg
03-0168	Salmonella enteritidis	S	I	S	S	S	S	S	S	I	S	S	S	S	Neg
03-0540	Salmonella enteritidis	R	I	S	S	S	R	S	R	S	S	S	S		Neg
03-0565	Salmonella enteritidis	R	I	S	S	S	R	S	S	S	S	S	S		Neg

## Sheet: Salmonella Typhi
ID samples	Organism	Nalidixic acid	Ciprofloxacin	Ceftriaxone	Ceftazidime	Augmentin	Ampicillin	Bactrim	Azithromycin	Chloramphenicol	Imipenem	Amikacin	Gentamycin	ESBL
01TY257	S. Typhi	S	S	S	S	S	S	S	S	S	S	S	S	NEG
01TY258	S. Typhi	S	S	S	S	S	S	S	S	S	S	S	S	NEG
01TY151	S. Typhi	S	S	S	S	S	S	S	S	S	S	S	S	NEG
01TY154	S. Typhi	S	S	S	S	S	S	S	S	S	S	S	S	NEG
01TY086	S. Typhi	S	S	S	S	S	S	S	S	S	S	S	S	NEG
01TY065	S. Typhi	R	S	S	S	S	S	S	R	S	S	S	S	NEG

## Sheet: Salmonella Paratyphi A
ID samples	Organism	Nalidixic acid	Ciprofloxacin	Ceftriaxone	Ceftazidime	Augmentin	Ampicillin	Bactrim	Azithromycin	Chloramphenicol	Imipenem	Amikacin	Gentamycin	ESBL
02TY067	S. Paratyphi A	R	I	S	S	S	S	S	S	S	S	S	S	NEG
02TY224	S. Paratyphi A	R	S	S	S	S	S	S	R	S	S	S	S	NEG
02TY242	S. Paratyphi A	R	I	S	S	S	S	S	R	S	S	S	S	NEG
DM188	S. Paratyphi A	R	S	S	S	S	S	S	R	S	S	S	S	NEG
ED293	S. Paratyphi A	R	I	S	S	S	S	S	R	S	S	S	S	NEG

## Sheet: Campylobacter jejuni
Strain ID	Organism	Nalidixic acid	Ciprofloxacin	Ceftriaxone	Ceftazidime	Augmentin	Ampicilin	Bactrim	Azithromycin	Chloramphenicol	Imipenem	Amikacin	Gentamicin	Erythromycin	Clindamycin	ESBL
01-0053	Campylobacter jejuni	R	R	R	R	R	R	S	S	S	S	S	S			Pos
01-0068	Campylobacter coli	R	R	R	R	R	R	S	S	S	S	S	S			Pos
01-0089	Campylobacter jejuni	S	S	R	R	R	R	S	S	S	S	S	S			Pos
01-0097	Campylobacter jejuni	R	R	R	R	R	S	S	S	S	S	S	S			Pos
01-0135	Campylobacter jejuni	R	R	R	R	R	R	R	S	S	S	S	S	S	S	Pos
01-0170	Campylobacter jejuni	R	R	R	R	R	R	R	S	S	S	S	S	I	I	Pos
01-0176	Campylobacter jejuni	S	S	R	R	R	S	S	S	S	S	S	S	S	S	Pos
01-0212	Campylobacter jejuni	R	R	R	R	R	R	R	S	S	S	S	S	S	R	Pos
01-0229	Campylobacter jejuni	R	R	R	R	R	R	R	S	S	S	S	S	S	S
01-0232	Campylobacter coli	R	R	R	R	R	R	R	R	R	S	I	R	R	R	Pos
01-0243	Campylobacter jejuni	R	R	R	R	R	S	S	S	S	S	S	S	S	S	Pos
01-0268	Campylobacter jejuni	R	R	R	R	R	R	S	S	S	S	S	S	S	S	Pos
01-0270	Campylobacter jejuni	R	R	R	R	R	R	S	S	S	S	S	S	S	S	Pos
01-0302	Campylobacter jejuni	R	R	R	R	R	R	S	S	S	S	S	S	S	S	Pos
01-0310	Campylobacter jejuni	R	R	R	R	R	S	S	S	S	S	S	S	S	S	Pos
01-0328	Campylobacter jejuni	R	R	R	R	R	R	R	S	S	S	S	R	R	R	Pos
01-0353	Campylobacter jejuni	R	R	R	R	R	R	R	S	S	S	S	S	S	S	Pos
01-0433	Campylobacter jejuni	R	R	R	R	R	R	R	S	S	S	S	S	S	S	Pos
01-0439	Campylobacter jejuni	R	R	R	R	R	R	R	S	S	S	S	S	S	S	Pos
01-0788	Campylobacter jejuni	R	R	R	I	S	R	R	R	R	S	R	R	R	R
02-0014	Campylobacter jejuni	R	R	R	R	R	R	S	S	S	S	S	S	S	S	Pos
02-1008	Campylobacter jejuni	R	R	R	R	R	R	R	S	S	S	S	S			Pos
02-1030	Campylobacter coli	R	R	R	R	R	R	S	S	S	S	S	S			Pos
02-1034	Campylobacter jejuni	R	R	R	R	R	R	R	S	S	S	S	S			Pos
02-1035	Campylobacter jejuni	R	R	R	R	R	R	S	S	S	S	S	S			Pos
02-1058	Campylobacter spp.	R	R	R	R	R	R	S	S	S	S	S	S	S	I	Pos
02-1065	Campylobacter jejuni	R	R	R	R	R	R	S	S	S	S	S	S	S	S	Pos
02-1078	Campylobacter jejuni	R	R	R	R	R	R	R	S	S	S	S	S	S	S	Pos
02-1081	Campylobacter jejuni	S	S	R	R	R	S	R	S	S	S	S	S	S	S	Pos
02-1092	Campylobacter jejuni	R	R	R	R	R	R	S	S	S	S	S	R	S	S	Pos
02-1097	Campylobacter jejuni	R	R	R	R	R	R	S	S	S	S	S	S	S	S	Pos
02-1115	Campylobacter jejuni	R	R	R	R	R	R	R	S	S	S	S	S	S	S	Pos
02-1140	Campylobacter jejuni	R	R	R	R	R	R	R	S	S	S	S	S	S	S	Pos
02-1150	Campylobacter jejuni	R	R	R	R	R	S	S	S	S	S	S	S	S	S	Pos
02-1151	Campylobacter jejuni	S	S	R	R	R	S	S	S	S	S	S	S	S	S	Pos
02-1159	Campylobacter jejuni	R	R	R	R	R	R	R	S	S	S	S	S	S	S	Pos
02-1186	Campylobacter jejuni	R	R	R	R	R	R	R	S	S	S	S	S	S	S	Pos
02-1222	Campylobacter jejuni	R	R	R	R	R	I	R	S	S	S	S	S	I	I	Pos
02-1242	Campylobacter jejuni	R	R	R	R	R	S	R	S	S	S	S	S	S	S	Pos
02-1263	Campylobacter jejuni	R	R	R	R	R	R	R	S	S	S	S	S	S	S	Pos
02-1265	Campylobacter jejuni	R	R	R	R	R	I	R	S	S	S	S	S	S	S	Pos
02-1277	Campylobacter jejuni	R	R	R	R	R	R	R	S	S	S	S	S	S	S	Pos
02-1286	Campylobacter jejuni	R	R	R	R	R	R	R	S	S	S	S	R	S	S	Pos
02-1289	Campylobacter jejuni	R	R	R	R	S	S	R	S	S	S	S	S	S	S
02-1307	Campylobacter jejuni	R	R	R	R	R	R	R	S	S	S	S	S	S	I	Pos
02-1318	Campylobacter jejuni	R	R	R	R	R	R	R	S	S	S	S	S	S	I	Pos
02-1325	Campylobacter jejuni	R	R	R	R	R	R	R	S	S	S	S	S	S	S	Pos
02-1375	Campylobacter jejuni	R	R	R	R	R	R	R	S	S	S	S	S	S	S	Pos
02-1378	Campylobacter jejuni	R	R	R	R	R	R	R	S	S	I	S	S	S	I	Pos
03-0009	Campylobacter jejuni	R	R	R	R	R	I	R	S	S	S	S	S			Pos
03-0018	Campylobacter jejuni	R	R	R	R	R	R	I	S	S	S	S	S	S	I	Pos
03-0020	Campylobacter jejuni	R	R	R	R	R	I	R	S	S	S	S	S	S	I	Pos
03-0038	Campylobacter jejuni	R	R	R	R	R	R	S	S	S	S	S	S	S	S	Pos
03-0048	Campylobacter jejuni	R	R	R	R	R	R	R	S	S	S	S	S	I	I	Pos
03-0075	Campylobacter jejuni	R	R	R	R	R	R	S	S	S	S	S	S	S	I	Pos
03-0120	Campylobacter jejuni	R	R	R	R	R	S	S	S	S	S	S	S	S	S	Pos
03-0129	Campylobacter coli	R	R	R	R	R	R	R	S	S	S	S	R	I	I	Pos
03-0136	Campylobacter jejuni	R	R	R	R	R	R	S	S	S	S	S	S	S	S	Pos
03-0141	Campylobacter jejuni	R	R	R	R	R	R	R	S	S	S	S	S	S	I	Pos
03-0156	Campylobacter jejuni	R	R	R	R	R	R	R	S	S	S	S	S	I	I	Pos
03-0174	Campylobacter jejuni	R	R	R	R	R	R	S	S	S	S	S	S	S	S	Pos
03-0204	Campylobacter jejuni	R	I	R	R	R	R	R	S	S	S	S	S	S	R	Pos
03-0253	Campylobacter jejuni	R	R	R	R	R	S	R	S	S	S	S	S	S	I	Pos
03-0328	Campylobacter jejuni	R	R	R	R	R	R	R	S	S	S	S	S	S	S	Pos
03-0330	Campylobacter jejuni	R	R	R	R	R	R	R	S	S	S	S	S	S	S	Pos
03-0338	Campylobacter jejuni	R	R	R	R	R	R	R	S	S	S	S	S	S	S	Pos
03-0348	Campylobacter jejuni	R	R	R	R	R	I	R	S	S	S	S	S	S	S	Pos
03-0396	Campylobacter jejuni	R	R	R	R	R	R	R	R	S	S	S	R	R	R	Pos
03-0422	Campylobacter jejuni	R	R	R	R	R	S	S	S	S	S	S	S	S	S	Pos
03-0429	Campylobacter jejuni	R	R	R	R	R	S	S	S	S	S	S	S	S	S	Neg
03-0433	Campylobacter jejuni	R	R	R	R	R	R	R	S	S	S	S	S	S	S	Pos
03-0445	Campylobacter jejuni	R	R	R	R	R	S	S	S	S	S	S	S	S	S	Pos
03-0449	Campylobacter jejuni	R	R	R	R	R	R	S	S	S	S	S	S	S	S	Pos
03-0462	Campylobacter jejuni	R	R	R	R	R	R	R	S	S	S	S	S	S	S	Pos
03-0591	Campylobacter jejuni	R	R	R	R	S	R	S	S	S	S	S	S	S	S

## Sheet: Klebsiella pneumonia
Sample ID	Organism	Amoxicillin	Cefotaxime	Ciprofloxacin	Bactrim	Gentamicin	Amikacin	Ofloxacin	Chloramphenicol	Meropenem	Colistin	Piperacillin-tazobactam	Imipenem	Tigecycline
127	Klebsiella pneumonia	R	R	R	R	R	R	R	R	R	S	R	R	S

## Sheet: E. coli
Strain ID	Organism	Chloramphenicol	Amikacin	Ampicillin	Nalidixic acid	Ciprofloxacin	Bactrim	Gentamycin	Azithromycin	Imipenem	Ceftazidime	Amoxicillin-clavulanate	Ceftriaxone	ESBL
01-0169	EAEC	S	S	S	S	S	S	I	S	S	S	I	S	NEG
01-0898	EPEC	R	S	S	I	S	R	S	S	S	S	S	S	NEG
01-0017	EPEC	S	S	R	S	S	R	S	S	S	S	R	S	NEG
01-0087-1-LT	ETEC	S	S	R	I	S	R	I	R	S	R	R	S	NEG
01-0582-1-LT	ETEC	R	S	R	S	S	R	R	R	S	S	R	S	NEG
