# Supplementary material for: The repurposing of Tebipenem pivoxil as alternative therapy for severe gastrointestinal infections caused by extensively drug-resistant Shigella spp
Source: eLife. 2022 Mar 15;11:e69798. doi: 10.7554/eLife.69798 (PMC8959600; doi:10.7554/eLife.69798)
Supplement: Supplementary file 2. [file elife-69798-supp2.xlsx]

## Sheet: Sheet1
Supplementary File 2. Profile and MIC ranges of marketed penem antimicrobials evaluated against S. flexneri EG478 and S. sonnei 02-1181
Compound	MIC range (µg/ml)	Route of administration
Meropenem	0.15	Injectable
Faropenem	2.5-6.25	Oral
Ertapenem	0.04-0.15	Injectable
Tebipenem	0.08-0.15	Orally bioavailable pro-drug
