# Supplementary material for: The repurposing of Tebipenem pivoxil as alternative therapy for severe gastrointestinal infections caused by extensively drug-resistant Shigella spp
Source: eLife. 2022 Mar 15;11:e69798. doi: 10.7554/eLife.69798 (PMC8959600; doi:10.7554/eLife.69798)
Supplement: Supplementary file 3. [file elife-69798-supp3.xlsx]

## Sheet: Sheet1
Supplementary File 3. Rates of spontaneous in vitro resistance for S. flexneri 2457T against a range of antimicrobials
Compound	MIC (µM)	Frequency of resistance @ 4x MIC	Frequency of resistance @ 10x MIC
Tebipenem	0.02	< 1.2 x 10-9	< 1.2 x 10-9
LpxC	0.06	< 1.5 x 10-9	< 1.5 x 10-9
Ciprofloxacin	0.06	< 1.2 x 10-9	< 1.2 x 10-9
Moxifloxacin	0.2	< 1.5 x 10-9	< 1.5 x 10-9
Mecillinam	0.2	< 6 x 10-8	< 6 x 10-8
Ceftriaxone	0.2	< 6 x 10-8	< 6 x 10-8
Ampicillin	7.5	< 3.2x 10-9	< 3.2x 10-9
Rifampicin	3.7	3.4 x 10-7	2.6x 10-7
